# Supplementary material for: Influence of the Microenvironment in the Transcriptome of Leishmania infantum Promastigotes: Sand Fly versus Culture
Source: PLoS Negl Trop Dis. 2016 May 10;10(5):e0004693. doi: 10.1371/journal.pntd.0004693 (PMC4862625; doi:10.1371/journal.pntd.0004693)
Supplement: S1 Table — (XLS) [file pntd.0004693.s002.xls]

## Sheet: Hoja1
	S1 Table. Primers and TaqMan-MGB probes used for qRT-PCR validation and the determination of differential expression in unresolved clones.
Annotation	Forward (5'-3')	Reverse (5'-3')	FAM-MGB probe (5'-3')
LinJ.06.0350	GCTCCGCATCAGGTGTATGG	CTCCAGCATGTTGGGCAAAA	CCACGCGACAACCTG
LinJ.07.0150	AGTTGAGGACTACGGTCTTGTCTT	TCCGAAGCTGCACCATCTG	TCAGCGCACGTCTACG
LinJ.07.0170	CCGAACACGGTGTACGTATCG	TCCAGCTCATCACCAACAAAGAT	CAGAGCCTGCGCTTTA
LinJ.07.0550	GCTGAACCAGTTCACGAAGGT	GGCGCGTACTTCTTGATCAG	TCAGCGCCTCGTTTCG
LinJ.08.0010	GCCGCGCCGAACAA	TTCCAAGACCAAACGACACCTT	ACGTGCGCCAGTGTAC
LinJ.08.0030	GAGGCCGTCGAGCCA	ACTCAGCGCCCTGTGAAC	ACACTGCCGCGAACCA
LinJ.10.0430	GCTGGAAATGCTGCCTTACCT	GCTTTGGAGATGAGCGTGAAG	CACGTCGGCCTCCCAC
LinJ.12.0480	GCTTCCACCAAACTACTATGTTGTG	CTTTCGTCCACACATCGTTGTAAAC	CCCCATCGACGCCTCT
LinJ.13.1020	GTCTTCCACCTAGAGCGTTTCTG	GGAGCAGGTCCGTCATGTC	CTGCCGCCGCATGAT
LinJ.16.0450	GCCGCGTGCTGCT	GCCGCCGTACTGATCCT	CCGCCACCAGCAGTC
LinJ.18.0150	CTCTCGATGAACCGCGTCTAC	GCGTTGAAGACCTCTGAGAACAG	ACTTGGCCCGCACCTC
LinJ.22.0480	TGGCACGCCGTCATCTC	CGAAGATTAGGTCCAGCTTGAAGA	CCCTGCGACACACCGT
LinJ.23.0040	CTGGCGGTGCACCCT	GTTGAGCTCGCCTGTTGTG	CCCACGGCGTACTCC
LinJ.23.0060	CAATACGAACGGGTCACAGTTTT	GGCCAAAGACAACGTGCTT	ACTGCTGCAACCCC
LinJ.23.0630	GCATACTTCTACTGCAGCTTCTTGA	GCAACAATGCGTCCTTTCGT	CACTCCAGCAAAGCTT
LinJ.23.1400	TGGAAAGGCCCTACTCAGTCA	TGCCGAGGATTAGCAGATTCAAAT	TCGAGCGCCGCATTC
LinJ.24.1890	GGCCGCATCGTGTACGT	GCTCACGCACCACGTT	CACAACGGCGTCTCC
LinJ.25.2280	GCAAGGAAAAGTTTGAGGTCGTT	GCAGCCCACCGTTGAC	CTGGCGCTCCTGTCCC
LinJ.26.1620/30	CGAAGAAGGACAACAAGAAGACC	CCTTGATGATCAGGCCAACCT	CTGGGTGACGACCTCC
LinJ.26.1680	CTGATGTTCAACCTGCTCGTGTA	GTGCCTAGAAAAGTACAGAGAAGGA	ACCAGCCCCAGAAGTA
LinJ.26.1690	GGTCAGCTGAAGGTAGAGATGGAT	CACCTTGGAGTAGTCGTCATCAG	CAAGCTGGACGCATTC
LinJ.26.2290	GGAAATGATGCCACTGCCATT	CGGATATCGAAGCAAATAGCAACAC	ACGAGCACACAAAGTT
LinJ.28.2280	GCCAGCTTTATTCGAAAGGAGTTC	CCGGCCAACAAAGCAGTTC	CACGTCGGGCCATACT
LinJ.28.2290	CCTACCGTGAACGCATTCG	GCTTCAGCAAAGGCACGAT	CCTCCTCGTCATCTGC
LinJ.29.0990	TGACGGACCAATAAAACTCGTGTT	CGAGTCCAAGGAGGCTTTTCTT	CTTTGGCGACTGCTCC
LinJ.29.2430	CGTACGTTGGCACCATGTG	ACATCGCTGCTAAAACCGTACAT	CCTTGCTCCAACCTCT
LinJ.30.0650	GGGTACGGCGACTGGAT	CGAAAACGATGCCGGTGTAGTA	TCCACGCACGACACTC
LinJ.30.2620	TGCAACTACGTAAGCCGCAT	GCACTCTTTACAAGCGGTTTGAAG	CCGATGCGCCAAGTAT
LinJ.30.3040	GCCGCCGCAATCGC	TGCCGCGCACAAAGAGA	ACGGCAGCGTAGCACT
LinJ.30.3710	CATGAAGCTCAACAAGAACAACCA	TCAGCACGCGCAGGTT	CCCAGACGCTGCTCC
LinJ.32.0460	CACATACGATCCCGATGAAGGT	CGGGCACGAGACGGA	ACGGAACCACACTTTC
LinJ.33.1410	CGCTTTGCAGTGCTGGAAA	GGCGCAGTCAGCTTAGC	CCCACCCAATTTTCCA
LinJ.33.1420	AAGAAGGACGCATTGTCAAAAGC	TTGTAGAGCGACCTCCTTGAAAC	ACGCACCTGACAGCTC
LinJ.34.1640	GTGCCTGCCTCTCTTTTGC	CTCAAATAATGCCTTCTCGGAATCG	CACCCGAACAGACCC
LinJ.35.3930	AGGCGTTTCGTGTCTTCGA	CGGCCACCGAGACTGT	CCCGTCCAAGTCTTTG
LinJ.36.0570	CCACGCAAAAGATTCCAGTTTCG	CGTATTTTTGAGCCACGAACAGTAAC	CCGCTCGTAAAACC
LinJ.36.2090	GAGACACGACCACTCTTCATCAC	CGCAAAGTTGAACACGTAGCT	ACCCCGTTGCTTGTTC
LinJ.36.3180	CGTGCAGCCACCGATGA	GTGCGTGTCTTCGAGATCTCT	TTGGCCGACAGCACCT
LinJ.36.3840	GGTGGACGACAACGAAAACG	CCGGTTTCCTCGTGCATCT	CAAGCTGCCATTCGTG
LinJ.36.3860	CGCTTGTGGCCGCTAAG	CACGACGCATTTCAAGCTCTTTT	TCCTCCGGGTCATTCA
LinJ.36.4880	CAGAAGCCGAACTTGCACAAG	GTAAAGAGCAGCCCACACAGT	CTGTCGCCATTTCTCA
LinJ.36.6780	CGACTTGGTGGACATTATTGACATG	ACTGGTGCACCGTCTGC	CAGGAGCGCGTCAATG
Ref. gene (gGAPDH)	AGAACTTCGGCATCGAGACT	CGTACTCGGGATGATGTTCA	CGTCTTCTGCGTCGCCGTGT
